# Supplementary material
Source: PubMed Central journal article supplement (PMC6173627)

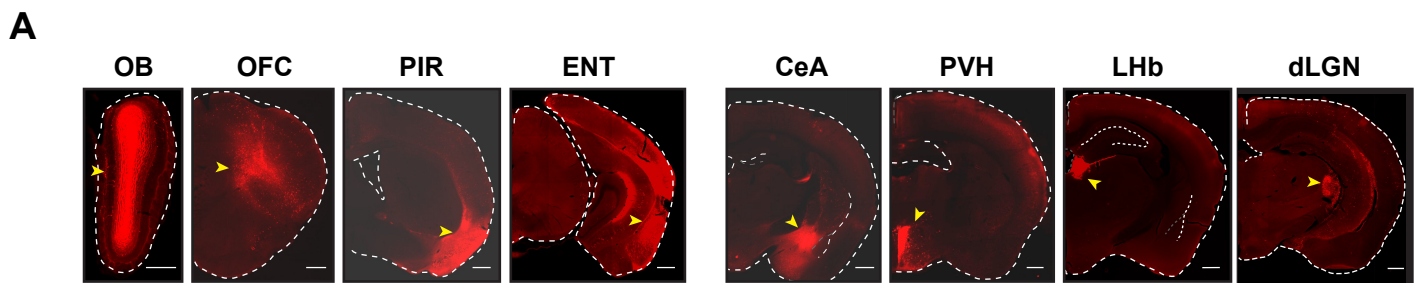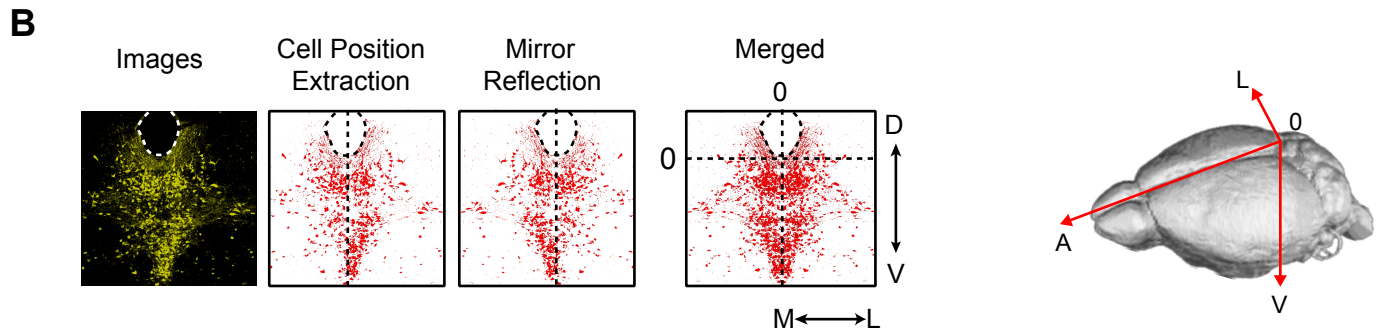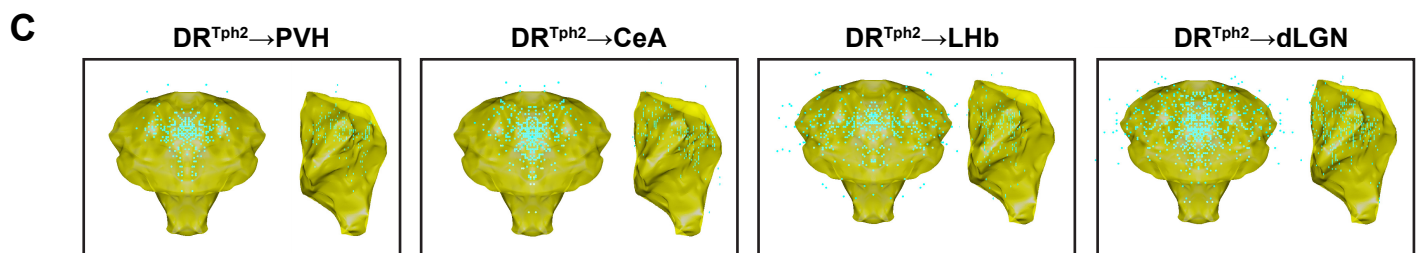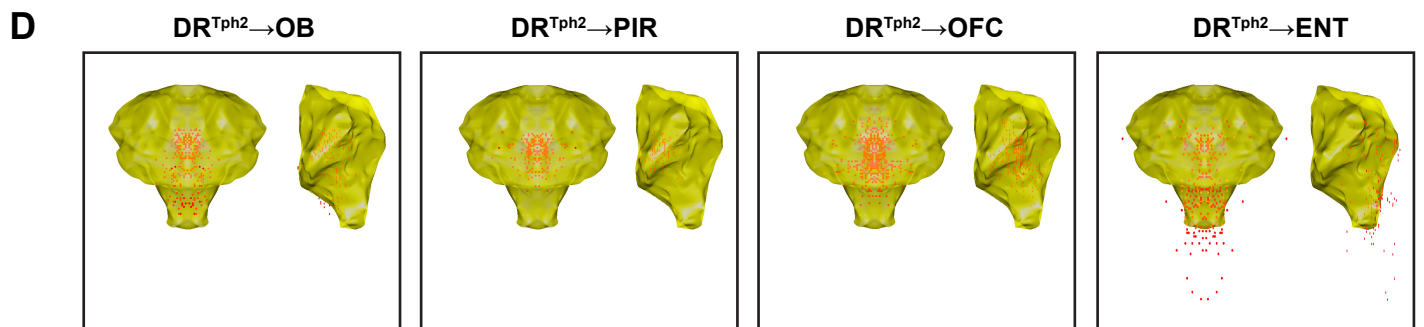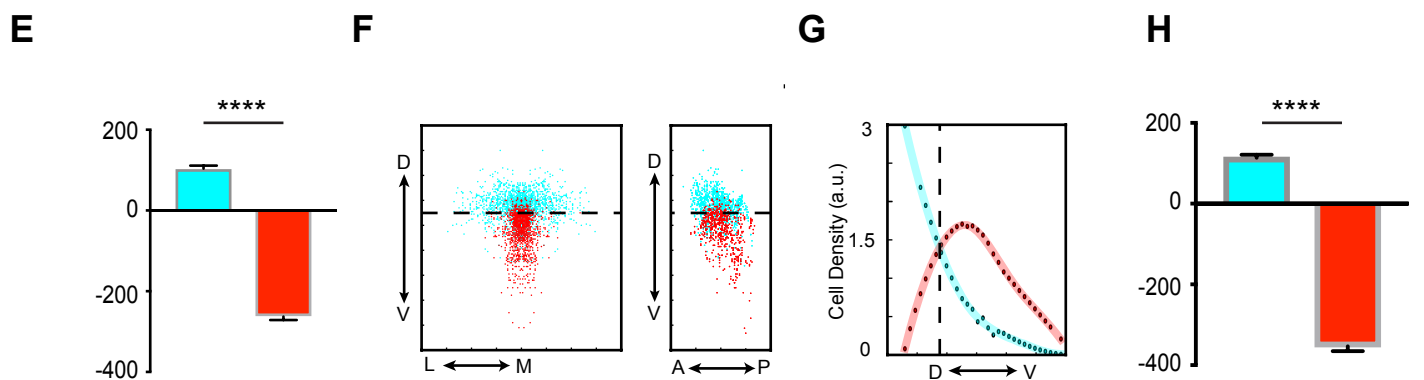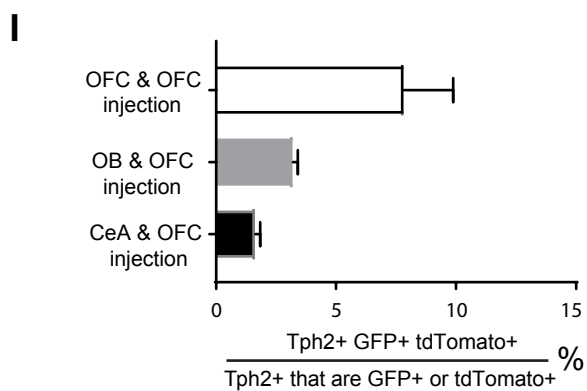

**Figure S1**

Supplement: NIHMS1502224-supplement-1.pdf [file NIHMS1502224-supplement-1.pdf]

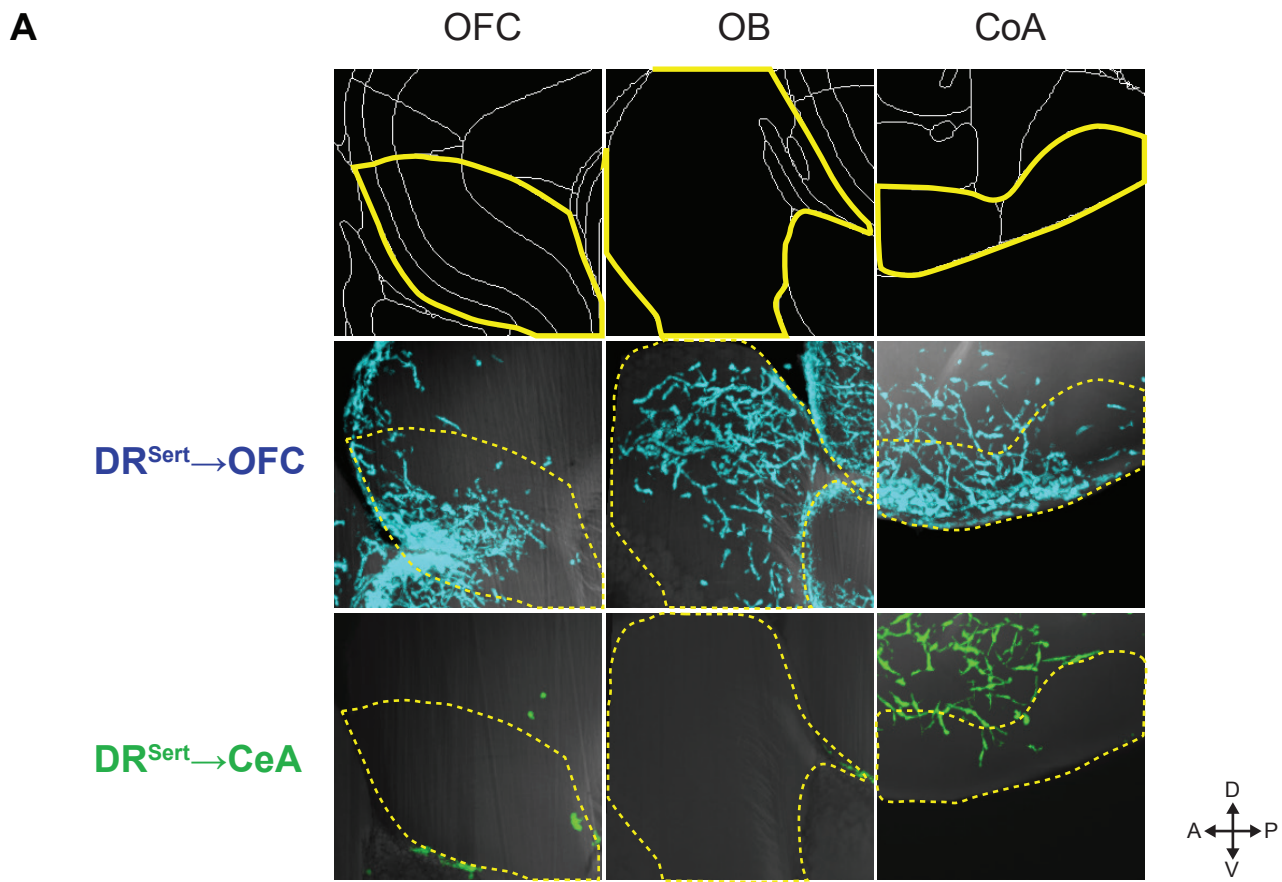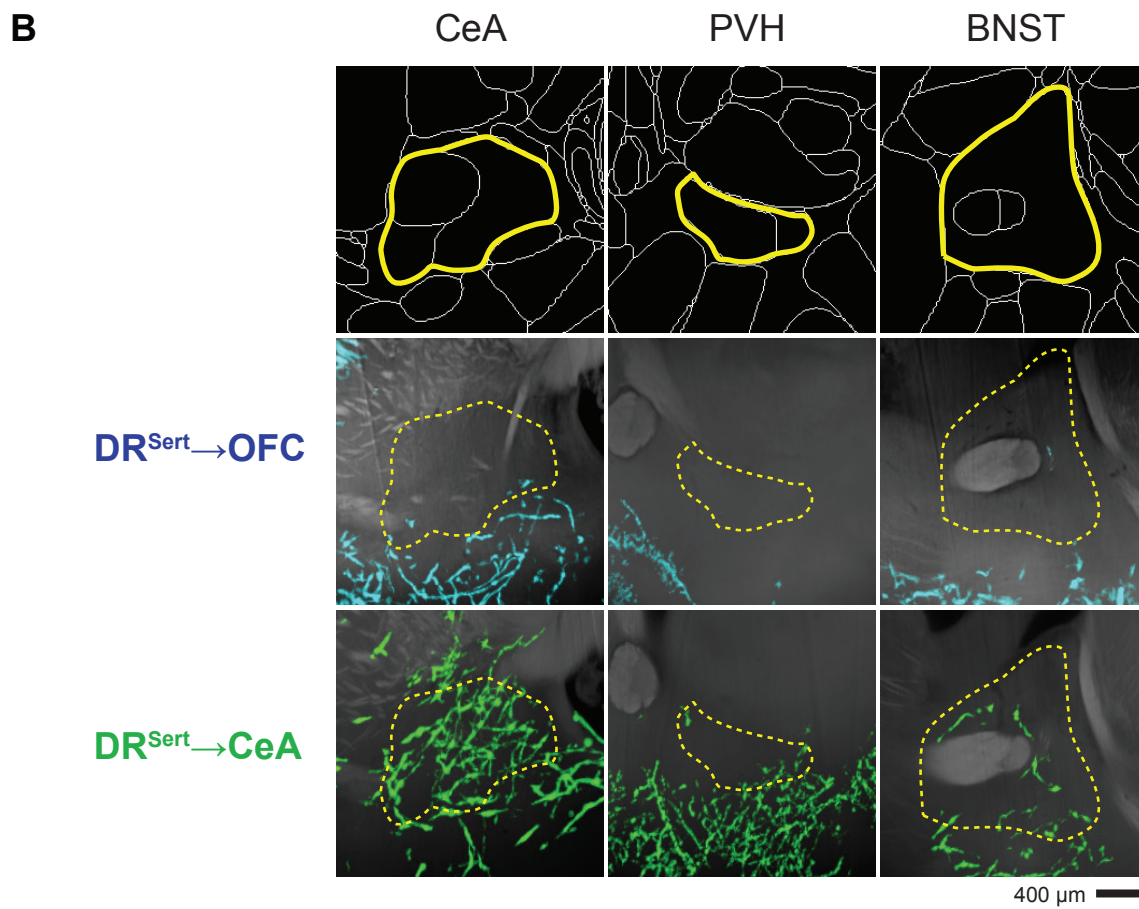

**Figure S2**

Supplement: NIHMS1502224-supplement-2.pdf [file NIHMS1502224-supplement-2.pdf]

**A****Experiemntal Groups**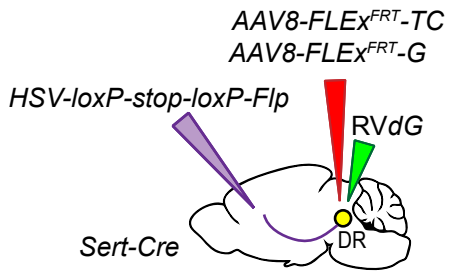**No Cre Ctrl**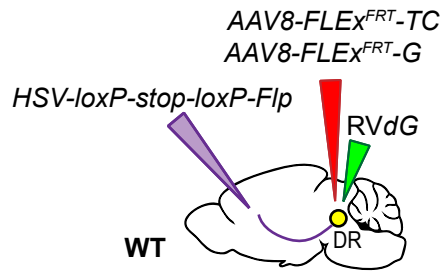**No G Ctrl**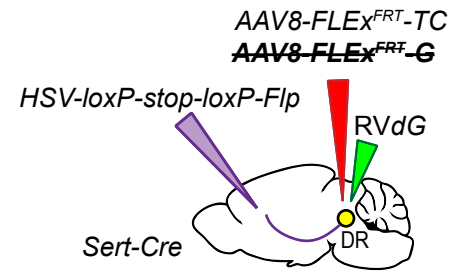**B**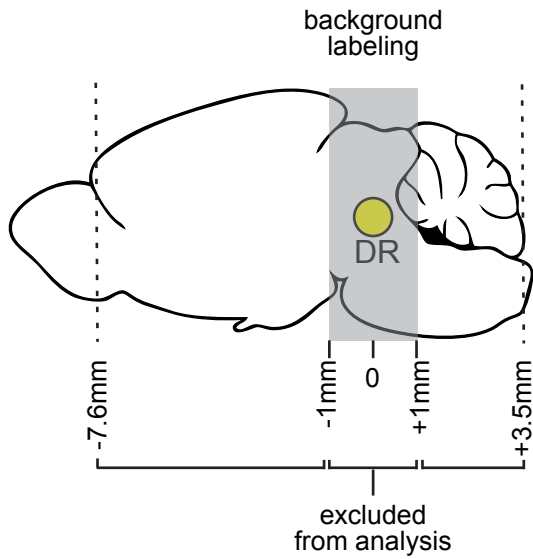**C**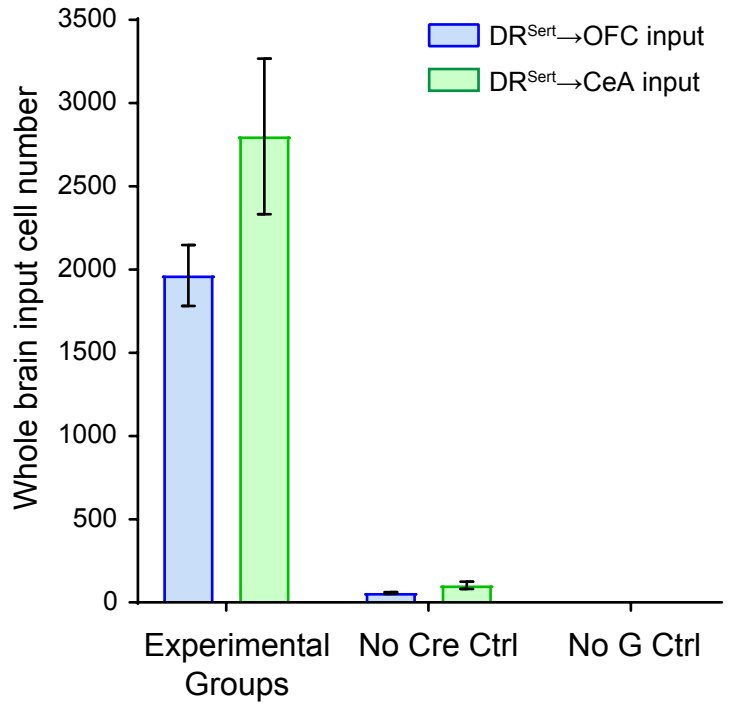**D**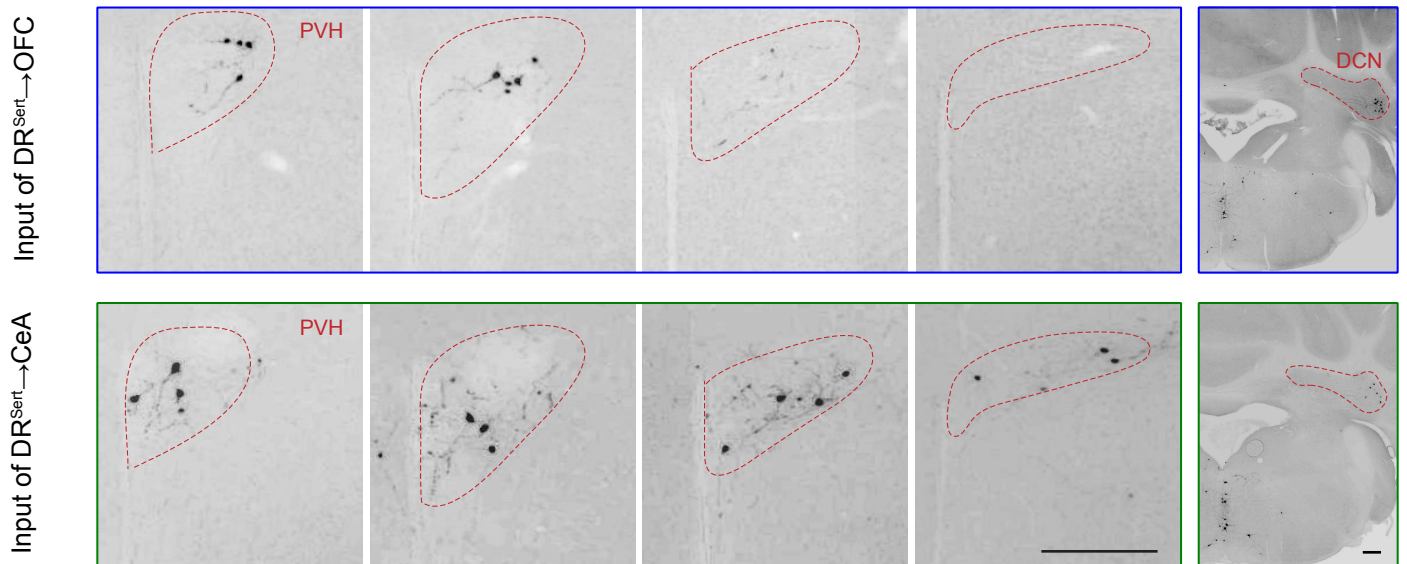

Supplement: NIHMS1502224-supplement-3.pdf [file NIHMS1502224-supplement-3.pdf]

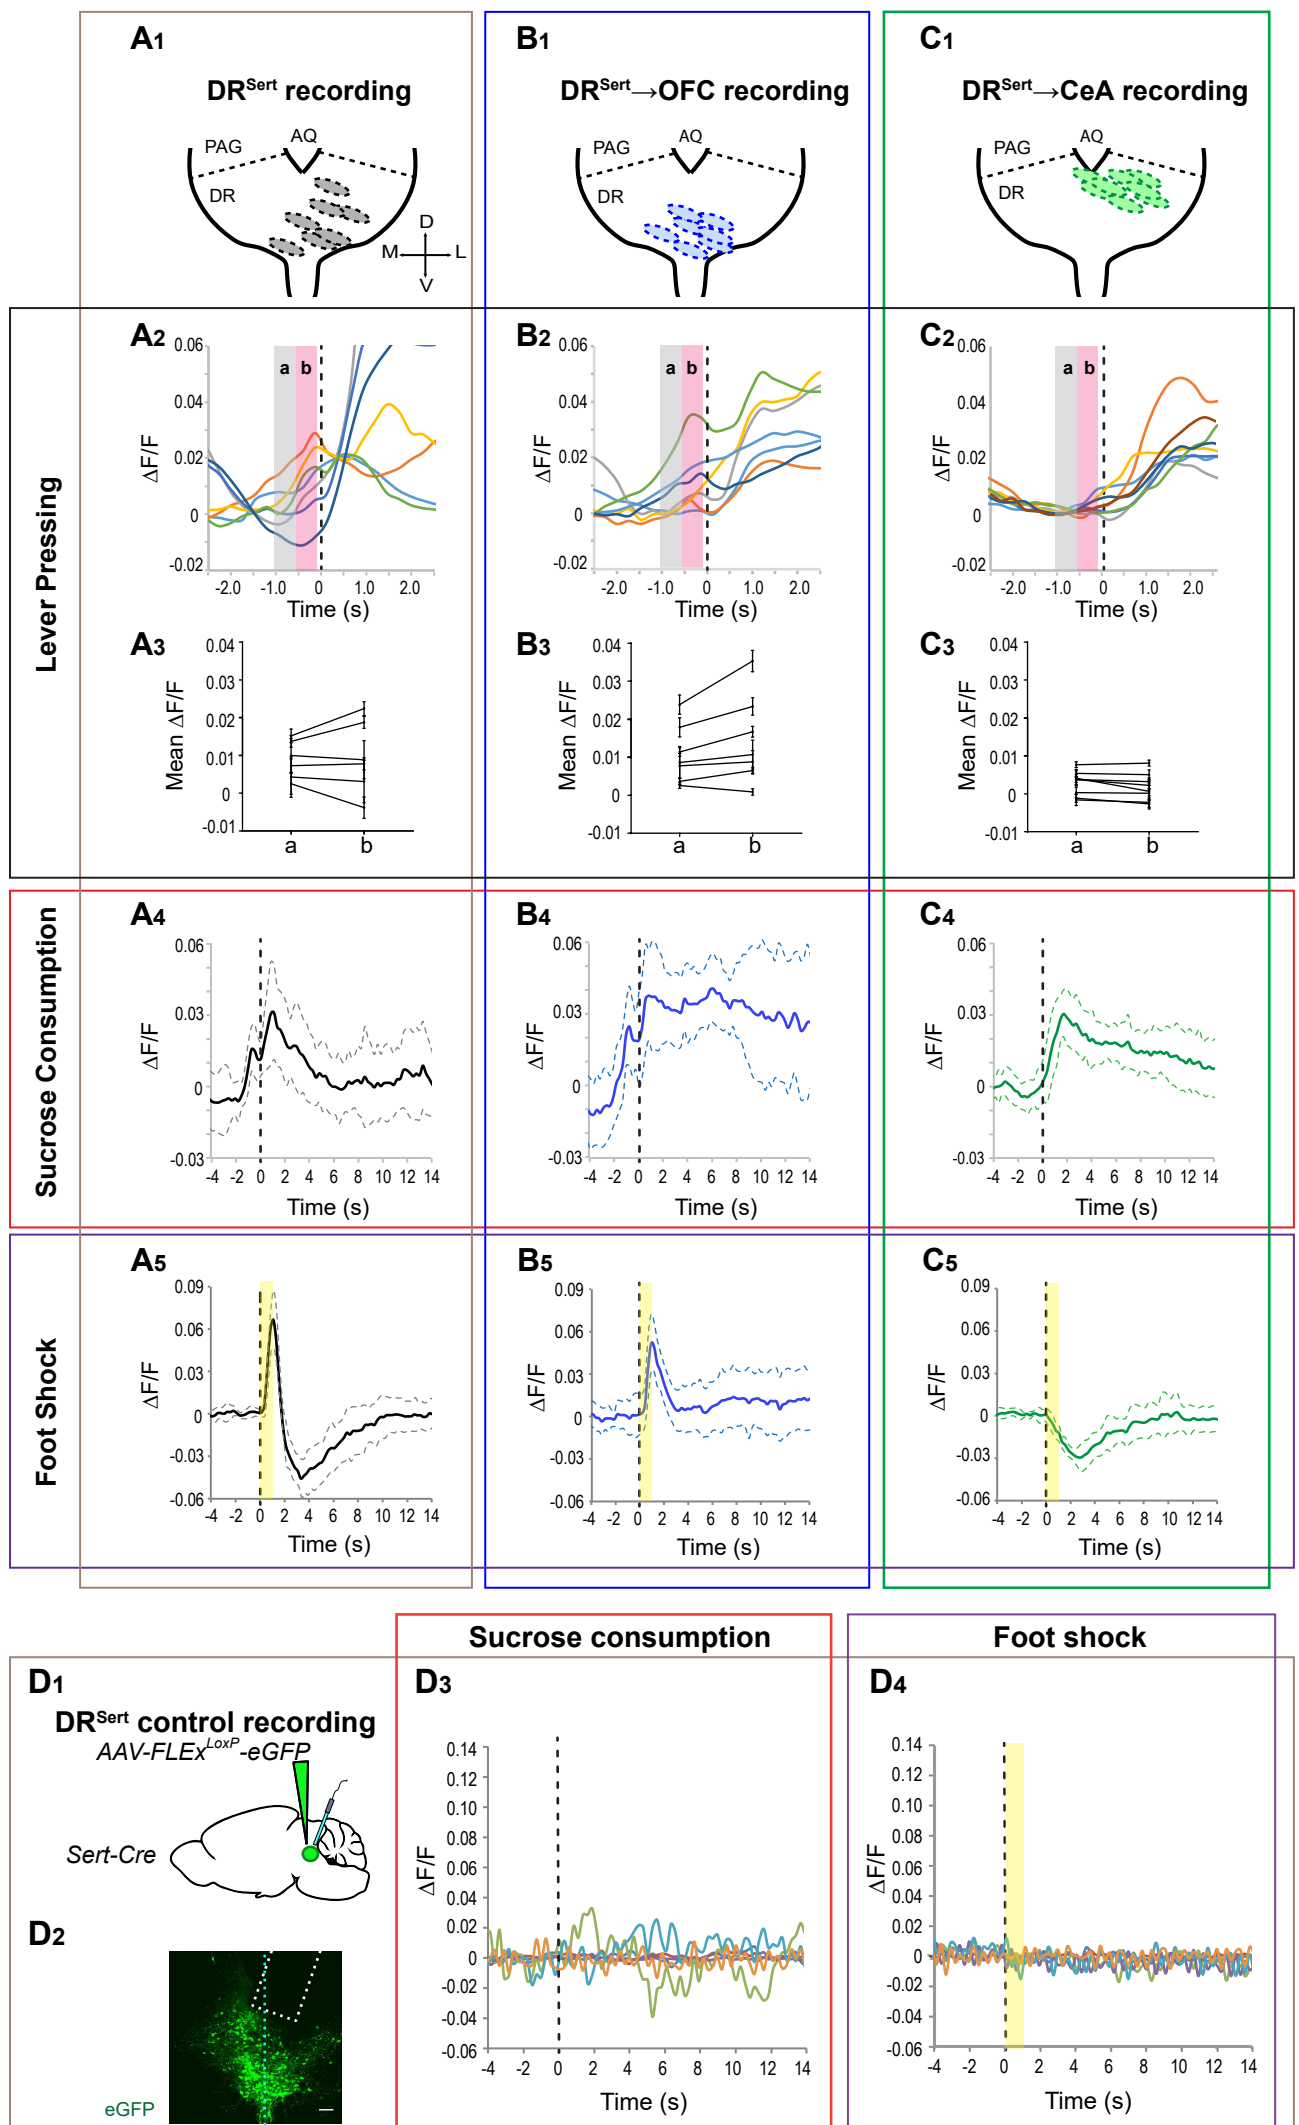

Figure S4

Supplement: NIHMS1502224-supplement-4.pdf [file NIHMS1502224-supplement-4.pdf]

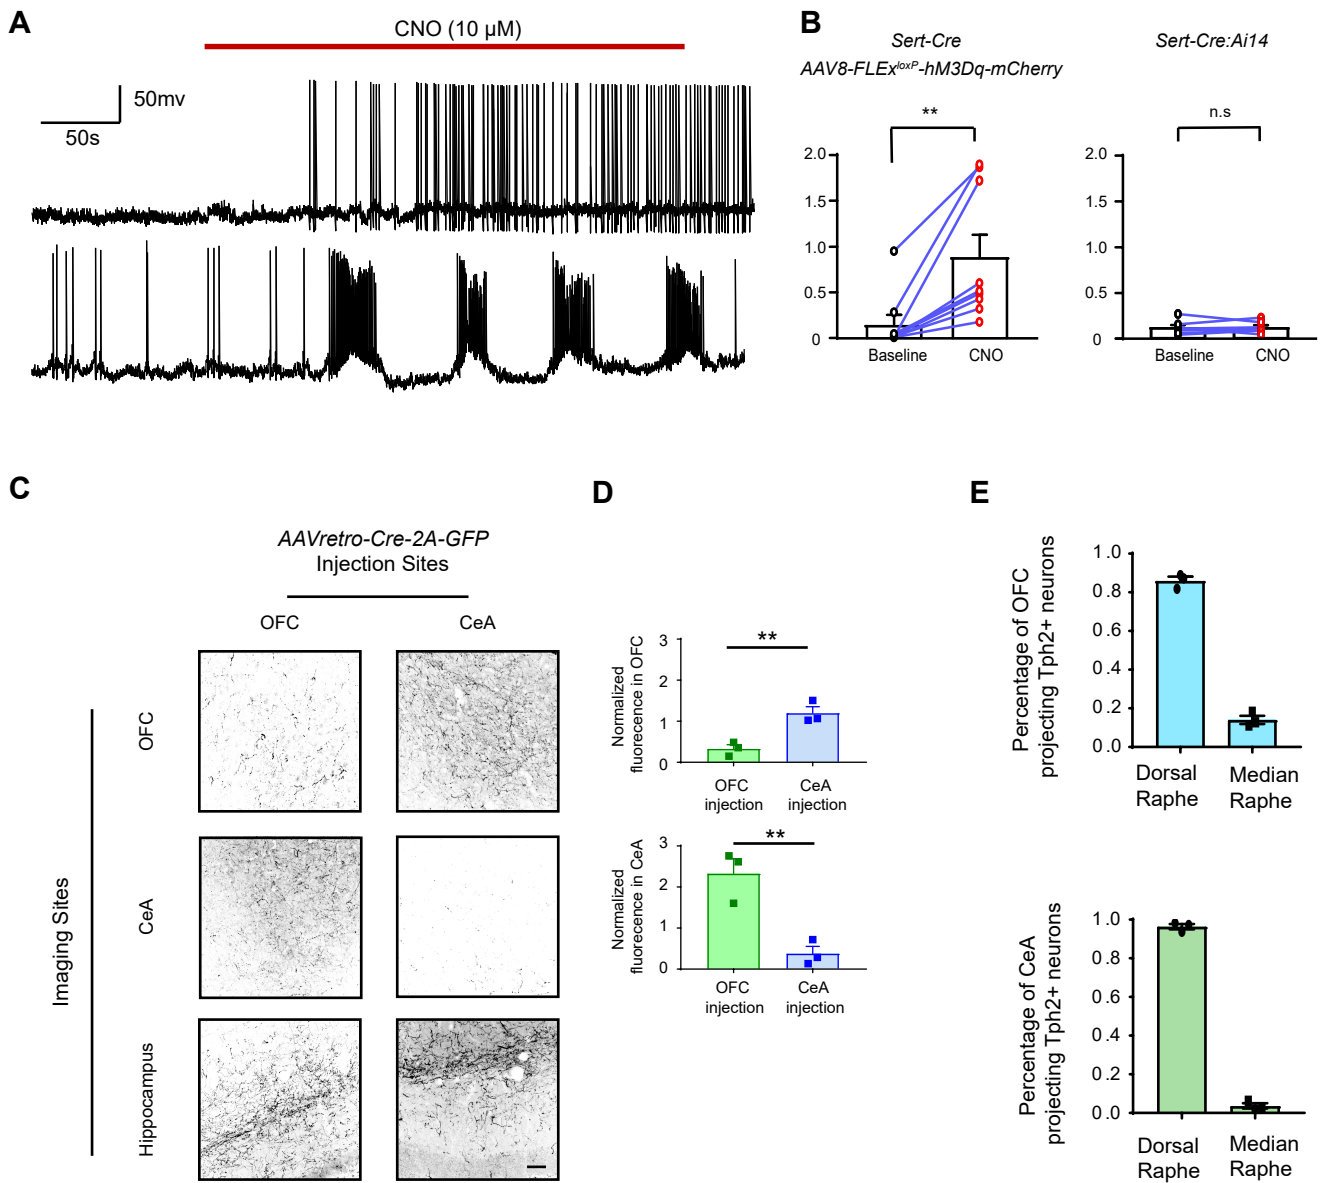

Figure S5

Supplement: NIHMS1502224-supplement-5.pdf [file NIHMS1502224-supplement-5.pdf]

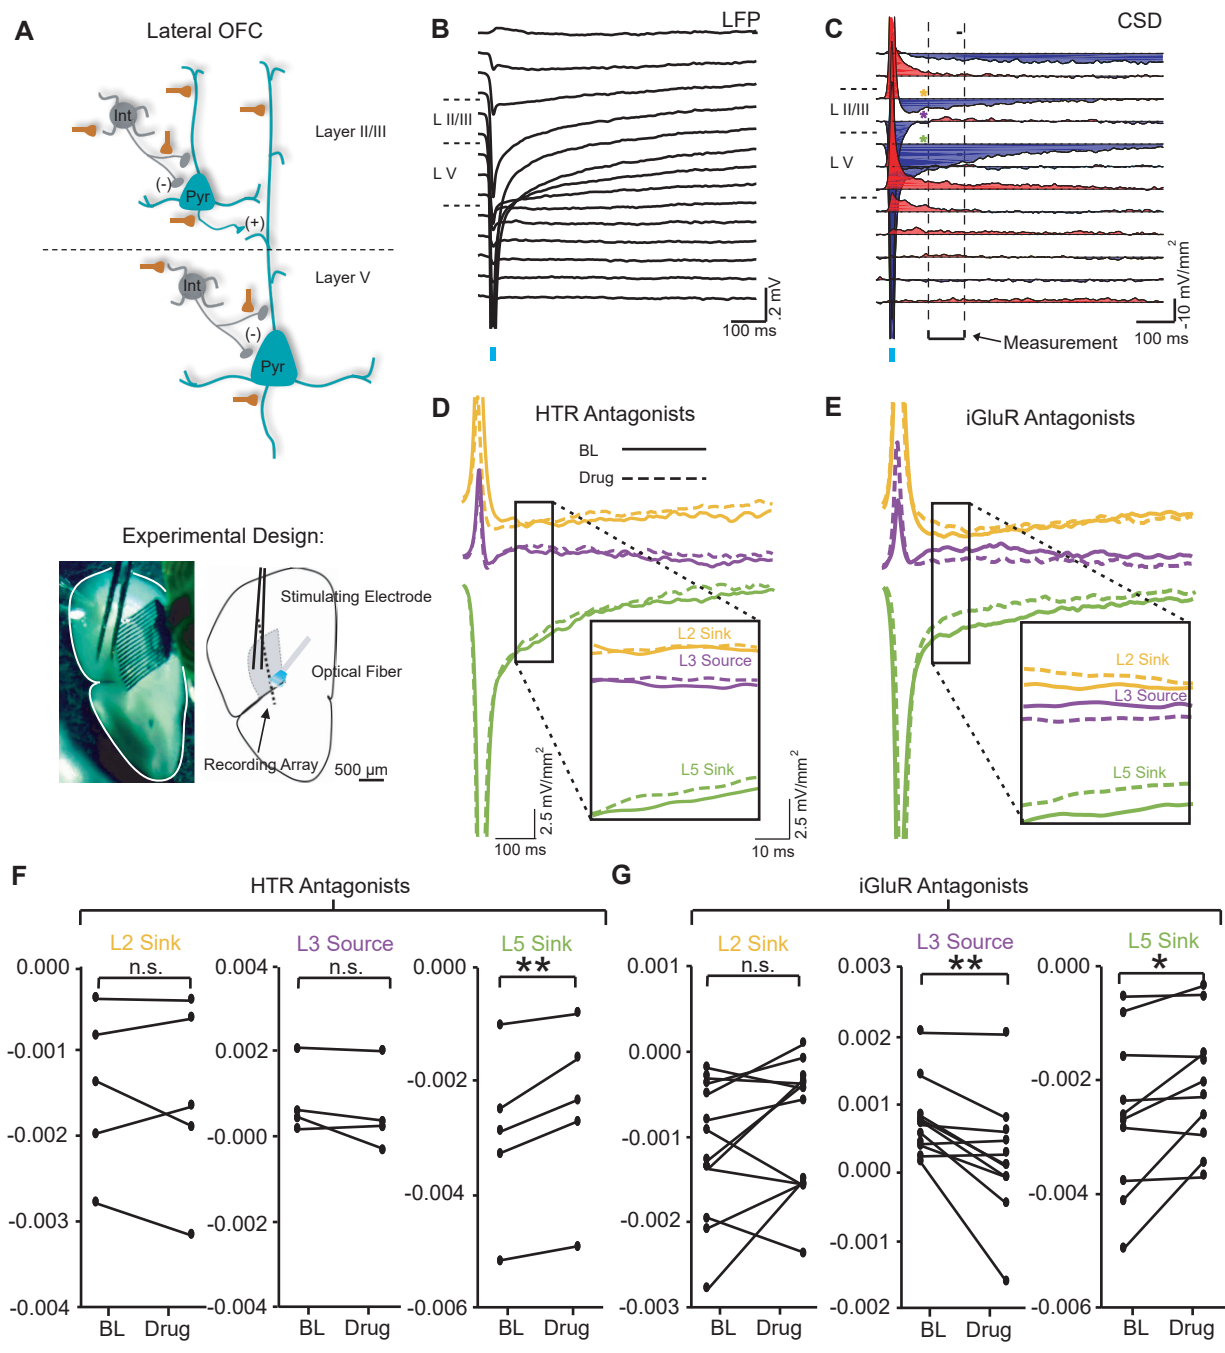

**Figure S6**

Supplement: NIHMS1502224-supplement-6.pdf [file NIHMS1502224-supplement-6.pdf]

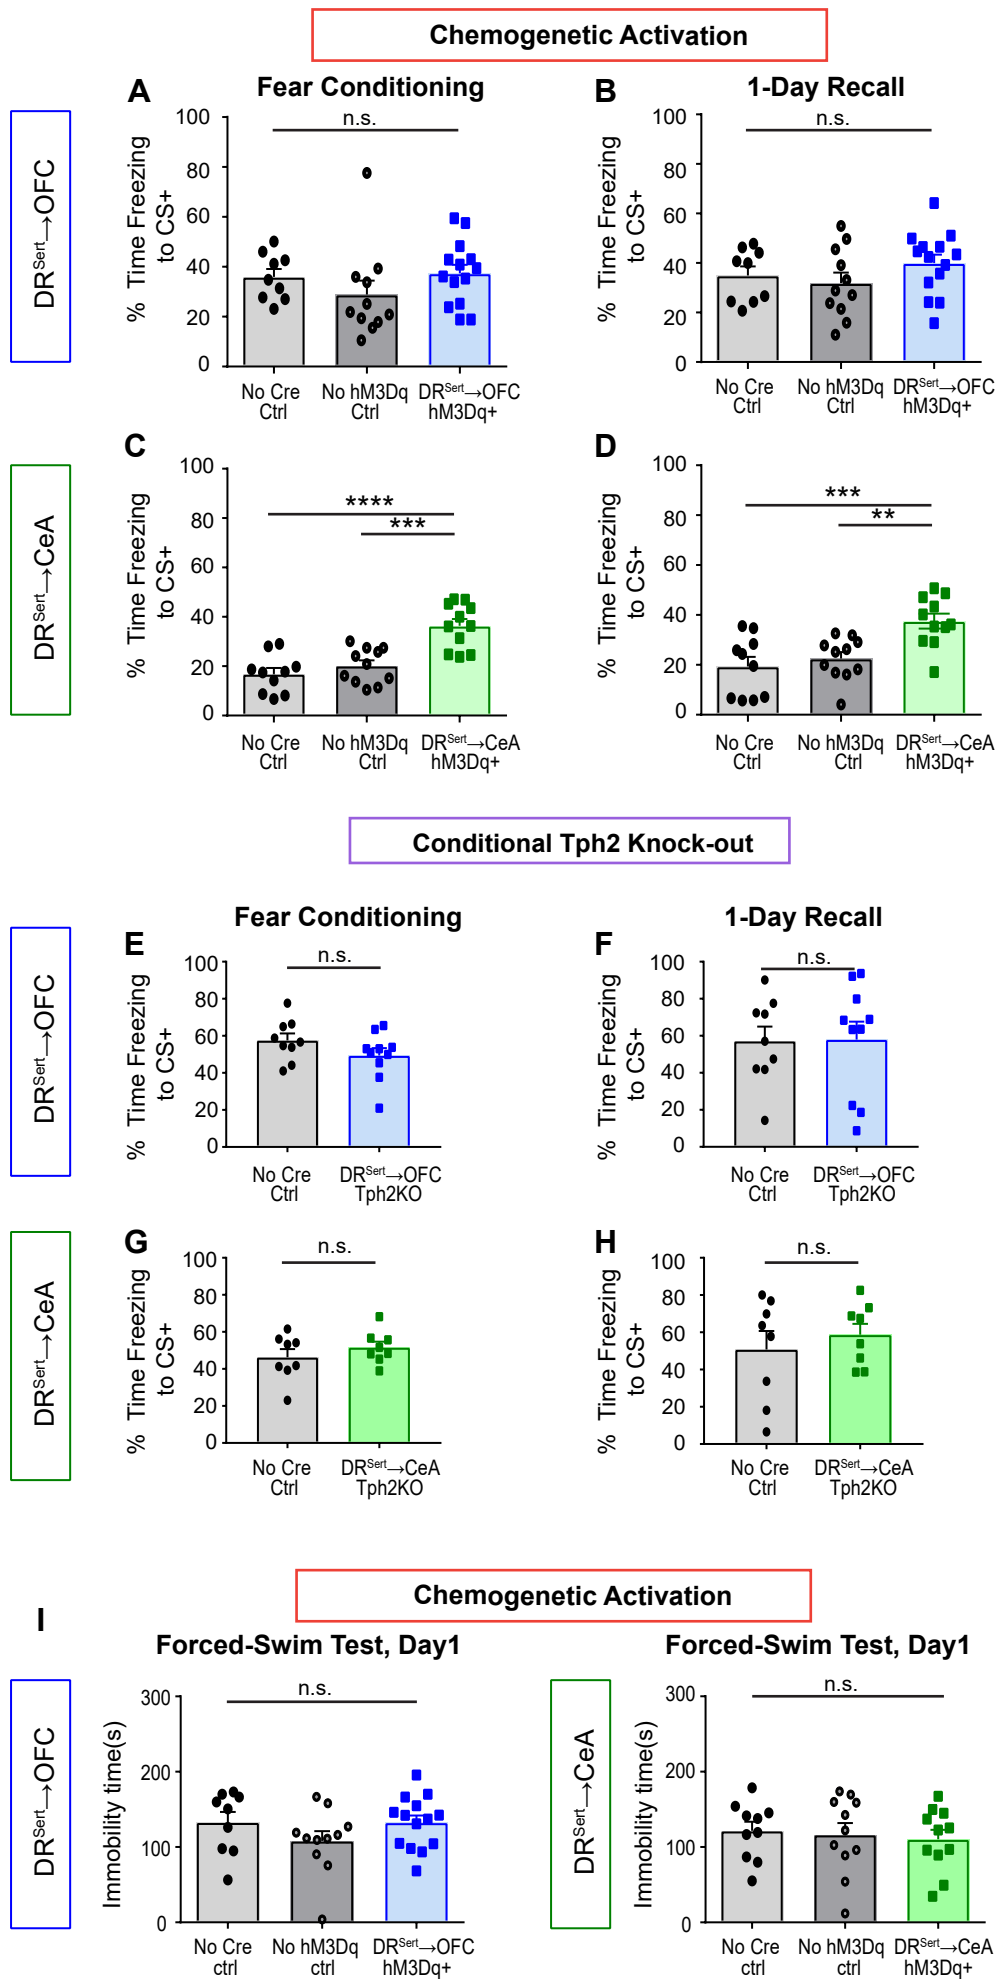

**Figure S7**

Supplement: NIHMS1502224-supplement-7.pdf [file NIHMS1502224-supplement-7.pdf]
